# Supplementary material
Source: Springer Nature journal article supplement (https://www.springermedizin.de/resource/supplementary/13054_2013_3001_MOESM7_ESM.docx/9712354)
Supplement: MOESM7 [file 9712354]

Figure 7

Figure 7a.

Figure 7b.

Figure 7c.
